# Supplementary material
Source: MDPI journal article supplement (https://www.mdpi.com/2073-4441/10/6/710)
Supplement: s1 [file s1]

Calibration parameter selection and watershed hydrology model evaluation in time and frequency domains

Karthik Kumarasamy 1 and Patrick Belmont 2

1 Department of Watershed Sciences, Utah State University, Logan, 84322-5210, USA; karthik.k@aggiemail.usu.edu

2 Department of Watershed Sciences, Utah State University, Logan, 84322-5210, USA; patrick.belmont@usu.edu

SUPPLEMENTARY INFORMATION

S1 LSRB and RRB Model description and calibration

There are 19 parameters contained in the HRU file that directly defines HRU properties and also control streamflow. The four parameters representing topographic characteristics were derived using a 10 m DEM. We did not calibrate these parameters as these were classified as derived parameters. There are thirteen parameters that represent land cover characteristics of which some were extracted from land use data, some others specified from literature and the rest were treated as pure calibration parameters when either measured data was not available or in case of conceptual parameters, where it can only be estimated through calibration. For example, OV_N defined as the Manning’s n for overland flow was specified a range and then varied within that range. In other words, it was treated as derived calibration parameter. DEP_IMP, the depth to impervious layer was treated as a pure calibration parameter. The ESCO and EPCO defined in Tables S1 and S2 were treated at the basin scale. The soil parameters were extracted from detailed soils information from the SSURGO database. The landscape is predominantly agricultural and land use and crop management properties were obtained from government documents of fertilizer use such as timing, type and rate.

S2 Description of evaluation metrics: NSE, R2 and PBIAS

Nash Sutcliff Efficiency (NSE): NSE can be interpreted as the comparative ability of a model with regards to a baseline model. In the case of the NSE it is the average value of the observations. The ideal value is 1.0 and values larger than 0 indicate ‘‘minimally acceptable’’ performance. NSE values equal to 0 indicates that the mean observed flow is a better predictor of observations than the model [[1](#_ENREF_1)]. NSE is shown in Equation S5.

| , | (S5) |
| --- | --- |

Coefficient of determination (R2): R2 estimates the combined dispersion against the single dispersion of the observed and predicted series and the ideal value is 1, with zero indicative of no correlation between modeled and observed values [[2](#_ENREF_2)]. R2 is shown in Equation S6.

| , | (S6) |
| --- | --- |

Percent Bias (PBIAS): PBIAS is measure used to determine the average tendency of the model predicted flows to be either larger or smaller than their observed flows and is shown in Equation S7. The ideal value is 0, a positive value indicates a model is has an underestimation bias, while negative values indicates an overestimation bias [[3](#_ENREF_3),[4](#_ENREF_4)].

| , | (S7) |
| --- | --- |

where and are observed and predicted values

S3 Illustration of equifinality using multiple criteria and models

Problems of equifinality, determining when a model is sufficiently well calibrated, and interdependencies among parameters present formidable challenges in calibration. For example, Figure S3 (a) shows the contour plot of NSE values computed from 1000 model runs, varying two flow routing parameters. Specifically, we varied Manning's "n" value for the tributary channels (CH_N1) between 0.025-0.035 and varied Manning's "n" value for the main channel (CH_N2) between 0.025-0.033, which are reasonable for “short grass” and “clean, straight, full stage, no rifts or deep pools,” respectively [[5](#_ENREF_5)]. Desirable NSE values, which we define as NSE values > 0.6 occur in the parameter space > 0.026 for CH_N2 and > 0.03 for CH_N1. However, if we hold tributary channel roughness (CH_N1) constant at the “normal” value of 0.03 and instead vary the Curve Number (CN2) and Manning's "n" value for the main channel (CH_N2), we can see that the entire space of CH_N2 yields desirable NSE values (i.e., NSE > 0.6 across the range of CH_N2 values for all negative adjustments in CN2 in Figure S3 (b)). Further, when we alter 18 parameters which are listed in Table S6, we now see that the entire parameter space for the both CH_N1 and CH_N2 contains desirable solutions (see dark blue portions of Figure S3 (c),). In Figure S3 (b) we see that CN2, which is commonly altered to achieve calibration, illustrates a similar situation where a 10% decrease from the initial value provides a wide range of desirable solutions. The implications of wide ranges in CN2 providing desirable solutions are discussed in Sect. 3.3. Many good solutions (medium to dark blue regions) exist within the parameter ranges evaluated, and each is associated with a substantially different representation of the physical system. Local maximas can be found throughout the parameter space and the automated routine such as Latin Hypercube Sampling procedure could potentially pick any one of the many solutions that are deemed good based on a lumped metric. Furthermore, selection of the parameter values is often conditioned on a specified stopping criteria, which may terminate calibration prematurely once an acceptable NSE value is obtained. The same three plots were generated with R2 and PBIAS as the performance metric and are shown Figure S4 and Figure S5. These plots indicate that multi objective criteria may not fully resolve the challenges with equifinality. In order to fully take advantage of multi objective criteria, individual criteria have to be mutually uncorrelated as described in [[6](#_ENREF_6)].

In Figure S4 (a), (b) and (c), we see that R2 captures regions similar to NSE as desired solutions. In Figure S5 (a) and (b), we see that PBIAS also captures regions similar to R2 as desired solutions. Percent Bias (PBIAS) is the error in the model prediction normalized by the measured stream flow. The ideal value for PBIAS is zero, with positive values indicating over prediction and negative values indicating under prediction. For easier comparison, Figure S5 (a-c) PBIAS values are shown as absolute values to stay consistent with cooler colors as desired solutions. Here closer to zero values are ideal solutions. Similar to NSE and R2, PBIAS fails to narrow the parameter space. A multi-objective criterion may not fully resolve the challenges with equifinality.

S4 Sensitivity of CN2

To illustrate this behavior, we varied CN2 ±10% and show the corresponding stream flow outcome for 1000 runs for the South Branch gage in the RRB. Varying CN2 by ±10% is a common practice to achieve calibration [[7](#_ENREF_7)] and cases as high as ±20% are also reported (Zhang et al., 2009). We can see over 50% variability in peak flows for a ±10% adjustment in CN2 (Figure S6 a-c). The implications of such changes when evaluating scenarios could render the model incapable of capturing the effects of certain management practices, as most practices alter CN ± 5%. To demonstrate this point, we altered CN2 ± 5% from the commonly employed initialized value based on local land use and management. In Figure S6 (a-c), we can see the lower and upper bounds that represents land use change or a management practice are completely within the calibration band. The conclusion that can be drawn from Figure S6 (a-c) is that certain management scenarios such as land use or management change can be within the realm of uncertainty. There are no differences in the upper limits of the +10% CN2 and +5% CN2 bands. The dominance of karst features consisting of sinkholes and sinking streams renders the highly sensitive CN2 insensitive beyond a certain threshold and does not translate to increased peak flows. Any increase in runoff from increased CN2 is damped by transmission losses in the tributary and main channels. However, the lower limits for the -10% CN2 case extends beyond the -5% CN2 case. This indicates an upper threshold and not a lower threshold for the ranges explored in this subbasin. CN2 is more sensitive at higher values approximately > 75, whereas it is less sensitive for lower values of CN2 approximately < 75 as shown in Figure S7. For example, a 10% increase in CN2 from 50 to 55 will result in a decrease of the retention parameter, S as shown in Equation S8 by 18%, while a 10% increase of CN2 from 80 to 88 will result to a decrease of S by 45%. S is used to compute surface runoff as shown in Equation S9.

S5 Retention parameter and surface runoff using curve number approach

| , | (S8) |
| --- | --- |

where, is the retention parameter (mm H2O) is the curve number for the day [[8](#_ENREF_8)].

| , | (S9) |
| --- | --- |

where, is surface runoff (mm H2O) and is the rainfall for the day (mm H2O) [[8](#_ENREF_8)].

S6 Euclidean distance, Empirical Q-Q plots and FDCs

Rather than simple visual comparison on modeled versus measured hydrographs, the HydroME Toolbox plots the difference between the two (Q measured – Q predicted), which makes it easier to identify large or systematic deviations. In addition, the empirical Quantile-Quantile plot is a graphical technique that can be used to roughly determine how well measured flow is predicted by the model [[9](#_ENREF_9)]. An example from the Le Sueur SWAT model (Little Cobb gage for 1996 to 2000) is shown in Figure S8 to illustrate the usefulness of these simple techniques. Figure S8 (a) shows mostly positive deviations, indicating the model is under-predicting streamflow. Although the reason cannot be determined from this plot alone, the plot illustrates the frequency, timing and magnitude of offsets, which led us to suspect that drain tile connectivity could be the cause of model under-prediction. The Empirical Quantile-Quantile (EQQ) plot is a plot between the quantiles of the measured flow and model predicted flow for the same time period. In the EQQ plot in Figure S8 (b), departure from the 1:1 reference line is minimal, with only slight biases at very low and high flows. Considering both of these plots, parameter adjustment during calibration can target those times and flows that are observed to be skewed. For the purpose of reporting model performance, the empirical Q-Q plot can provide information that cannot be gleaned from a lumped metric alone.

Flow Duration Curves (FDCs) are simple, yet powerful and insightful graphical representations that allow for the evaluation of a full range of flows that occur during a period of interest. FDCs are used extensively in hydrologic analyses and have been qualitatively used for evaluating model performance [[10](#_ENREF_10)], but are rarely used during calibration of a hydrologic model. While flow duration curves eliminate the timing of flows, they are a quick and easy means to evaluate which components of the flow regime (high, moderate, or low flows) are systematically under- or over-predicting. Figure S8 (c) illustrates the calibrated model is capable to capturing most flows below 80% exceedance. The uncalibrated model deviates from measured flows across the full range of flows.

S7 Analysis using wavelets: time-frequency

Analysis using wavelets overcomes limitations of the classical Fourier analysis and is well suited for non-stationary signals such as hydrologic signals [[11](#_ENREF_11)]. Wavelet transform utilizes basic functions called wavelets to transform a signal into its constituent frequencies while providing time localization. Signal decomposition is accomplished through wavelets, which are applied as a bandpass filter [[12](#_ENREF_12)]. The complex non-orthogonal Morlet wavelet is a complex exponential (sinusoidal function) modulated by a Gaussian envelope which ensures time localization and is described as shown in Equation S1 [[13](#_ENREF_13),[14](#_ENREF_14)].

| , | (S1) |
| --- | --- |

where, is the wavelet function, also called the mother wavelet. Similar to the classical version of the Heisenberg’s uncertainty principle, if we want a precise characterization of frequency, we cannot precisely locate the frequency in time and vice versa [[11](#_ENREF_11),[15](#_ENREF_15)]. The set at 6, provides a good balance between time and frequency localization [[12](#_ENREF_12)]. The second term in Equation (S1) is a correction factor to satisfy the admissibility criteria of zero mean or no non-zero frequency and for , becomes so small that it can be neglected [[14](#_ENREF_14)]. It also refers to the number of cycles in the wavelet. is non-dimensional time parameter which is defined as , is the measure of support and is set as 1. Complex Morlet is also ideal for feature extraction [[13](#_ENREF_13)].

The continuous wavelet transform (CWT), , is defined as the convolution of a discrete sequence (real signal) , , where is the length of the time series, with the scaled and translated version of the mother wavelet function, (see Equation S2) [[13](#_ENREF_13)].

| , | (S2) |
| --- | --- |

where, is the complex wavelet transform, is a dimensionless variable called the scale dilation parameter and corresponds to the width of the wavelet with , is also a dimensionless variable called the translational parameter and corresponds to the actual position of the wavelet in the physical space with , is the sampling time step, is the normalization factor which causes all wavelets (corresponding to each scale) to have the same norm resulting in same energy. The CWT matrix contains an estimate of the instantaneous hydrologic response that is influenced by neighboring activity. is the modulus of the CWT also called the amplitude (Liu, 1994). The univariate CWT can be extended to compare two signals and in the context of wavelet analysis to obtain regions of high common power and can be estimated with the cross wavelet transform, , as defined in Equation S3 [[16](#_ENREF_16)].

| , | (S3) |
| --- | --- |

where, * denotes the complex conjugate.

Wavelet coherence,, can be used to identify the scales and time periods where the two signals are similar. The squared modulus of the cross wavelet transform normalized by the product of the wavelet transforms of the individual signals results in the wavelet coherence [[17](#_ENREF_17)]. It is a measure analogous to the coefficient of determination in statistics and can be used to compare any two signals and is defined as shown in Equation S4 [[16](#_ENREF_16)].

| , | (S4) |
| --- | --- |

The ordinate of the wavelet coherence plot corresponds to period, which is the inverse of frequency and is the approximate Fourier period. The period in days represents the approximate width of the dilated basis function, here complex Morlet, which is used to evaluate the signal. The procedure for obtaining the coherence plot entails generating a continuous wavelet transform (CWT) of the individual signals, which are then compared. CWT decomposition results in a higher coefficient if a particular frequency is present for any specific day. The two CWTs are then compared to obtain a coherence value, which reveals if the two CWTs are similar. For example, the 32 or 128 day period in a coherence plot refers to the frequencies corresponding to those days and a range of frequencies are identified by the term band. A higher coefficient indicates that a particular frequency was present in both the signals. Additionally, frequency represents how often an event is repeating. By comparing the signal to a known function with known frequency, the complex Morlet in this paper, we can determine whether an event is repeating. See also [Daubechies [18](#_ENREF_18)] or [Foufoula-Georgiou and Kumar [19](#_ENREF_19)] and the references therein.

**Figure S1.** Scheduling of management operations under corn-soybean rotation in the Le Sueur River Basin (LSRB) and are typical management practices that occur within the LSRB. The schedule shown is for HRUs that are initialized with corn as land use. HRUs with soybean as the land use for the 1st year will have the management operations from year 2 as year 1 operation and year 1 as year 2.

**Figure S2.** Scheduling of management operations under corn-soybean rotation in the Root River Basin (RRB) and are typical management practices that occur within the RRB. The schedule shown is for HRUs that are initialized with corn as land use. HRUs with soybean as the land use for the 1st year will have the management operations from year 2 as year 1 operation and year 1 as year 2.


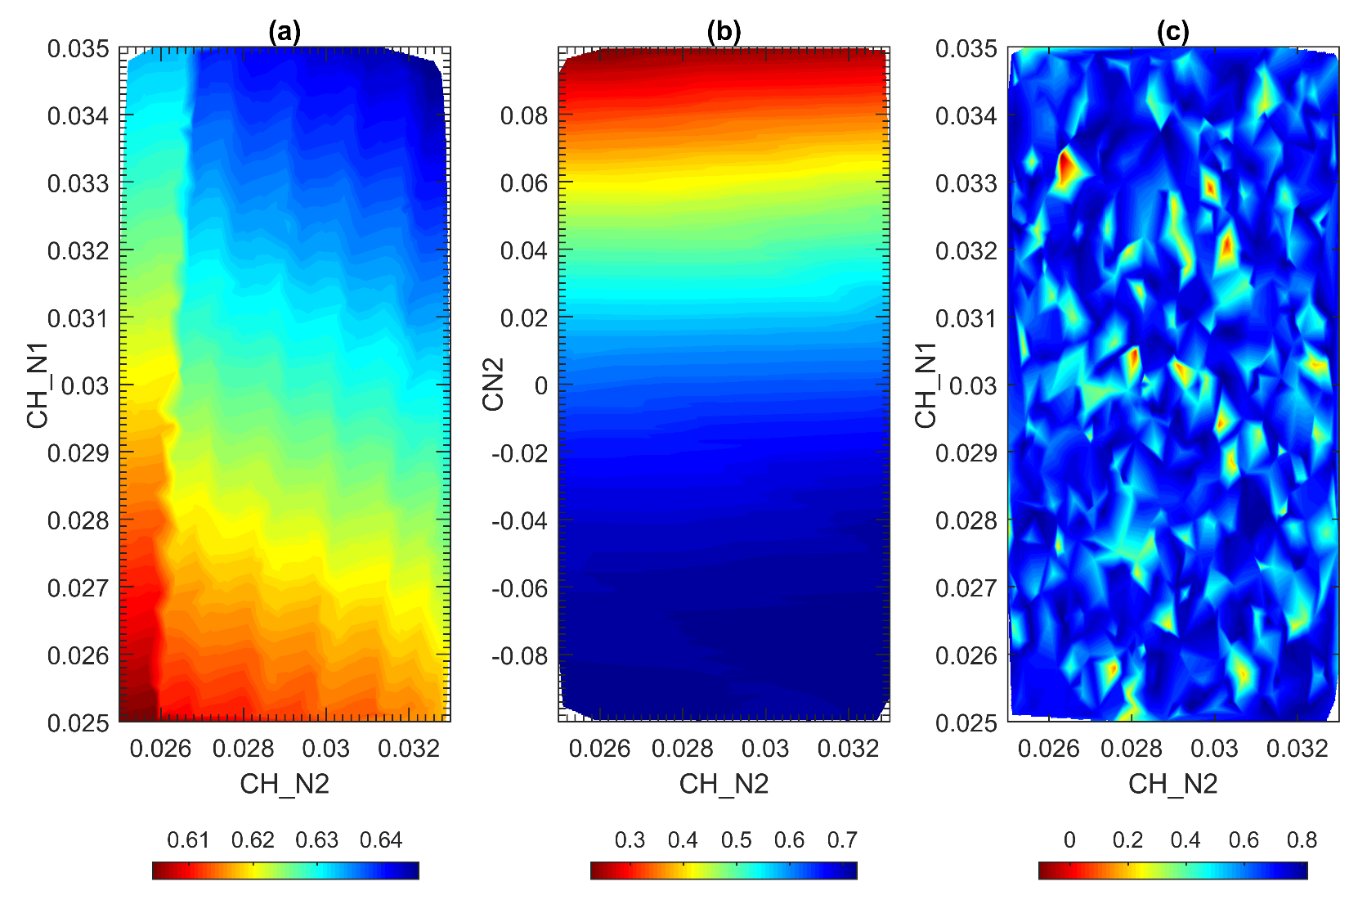


**Figure S3.** (a), (b) and (c) were generated from 1000 runs each using the SWAT model for the South Branch of the Root River (sub-model of the Root River SWAT model with same parametrization as the larger RRB model. (a) Contour plot of NSE (coded as color) value for Manning's "n" value for the tributary channels (CH_N1) and Manning's "n" value for the main channel (CH_N2). (b) Contour plot of NSE value for CN2 and Manning's "n" value for the main channel (CH_N2). (a) Contour plot of NSE value for Manning's "n" value for the tributary channels (CH_N1) and Manning's "n" value for the main channel (CH_N2) when 18 parameters were varied.


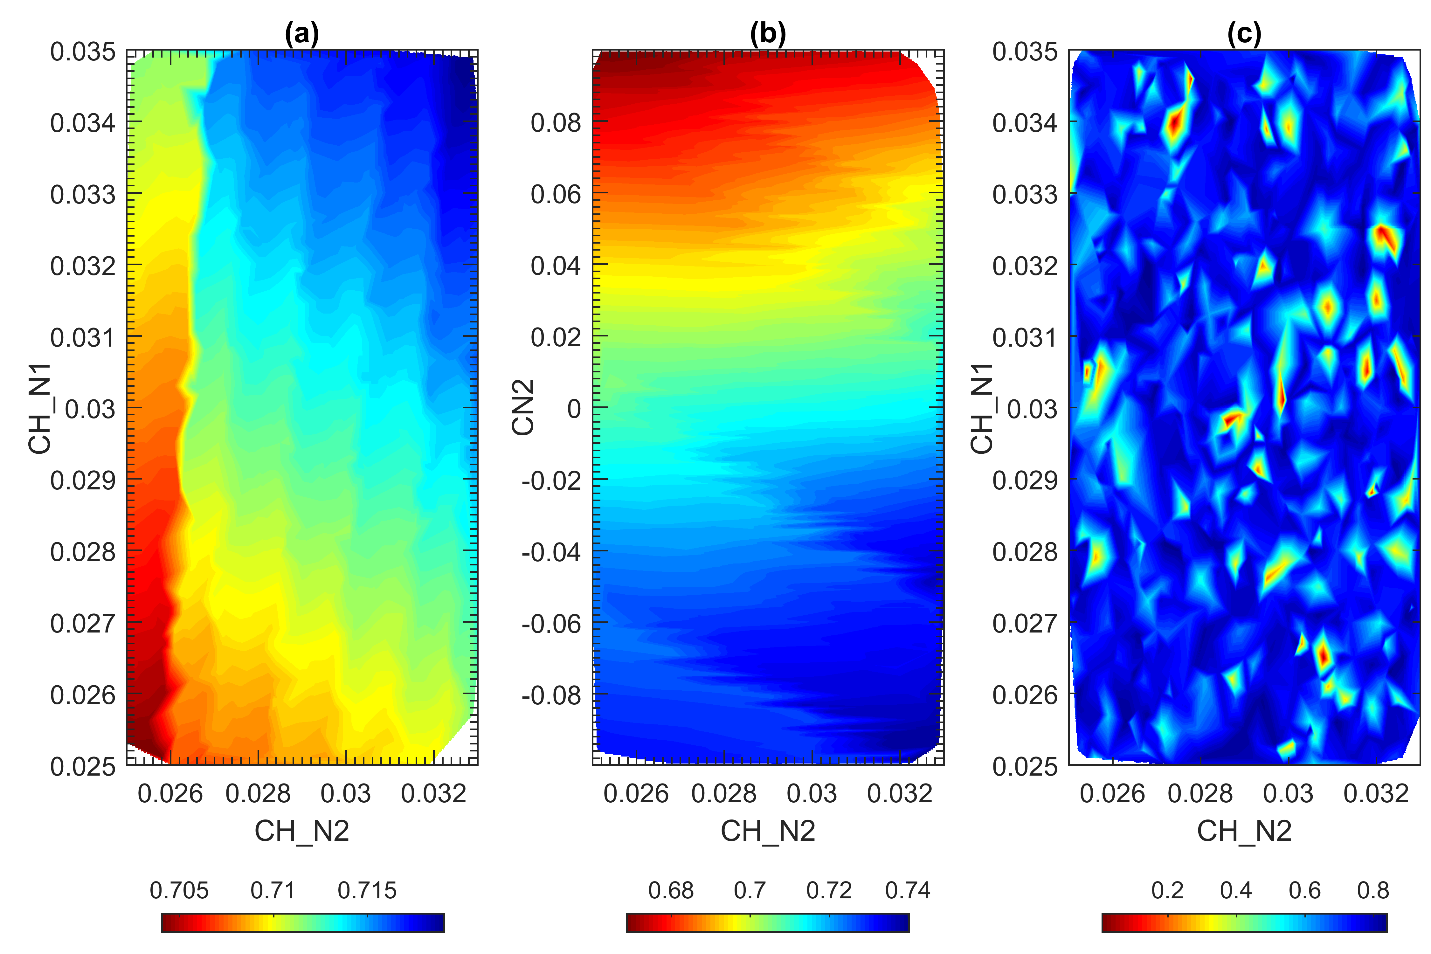


**Figure S4.** (a), (b) and (c) were generated from 1000 runs each using the SWAT model for the South Branch of the Root River (sub-model of the Root River SWAT model with same parametrization as the larger RRW model. (a) Contour plot of R2 (coded as color) value for Manning's ‘n’ value for the tributary channels (CH_N1) and Manning's ‘n’ value for the main channel (CH_N2). (b) Contour plot of R2 value for Curve Number (CN2) and Manning's ‘n’ value for the main channel (CH_N2). (a) Contour plot of R2value for Manning's ‘n’ value for the tributary channels (CH_N1) and Manning's ‘n’ value for the main channel (CH_N2) when 18 parameters were varied.


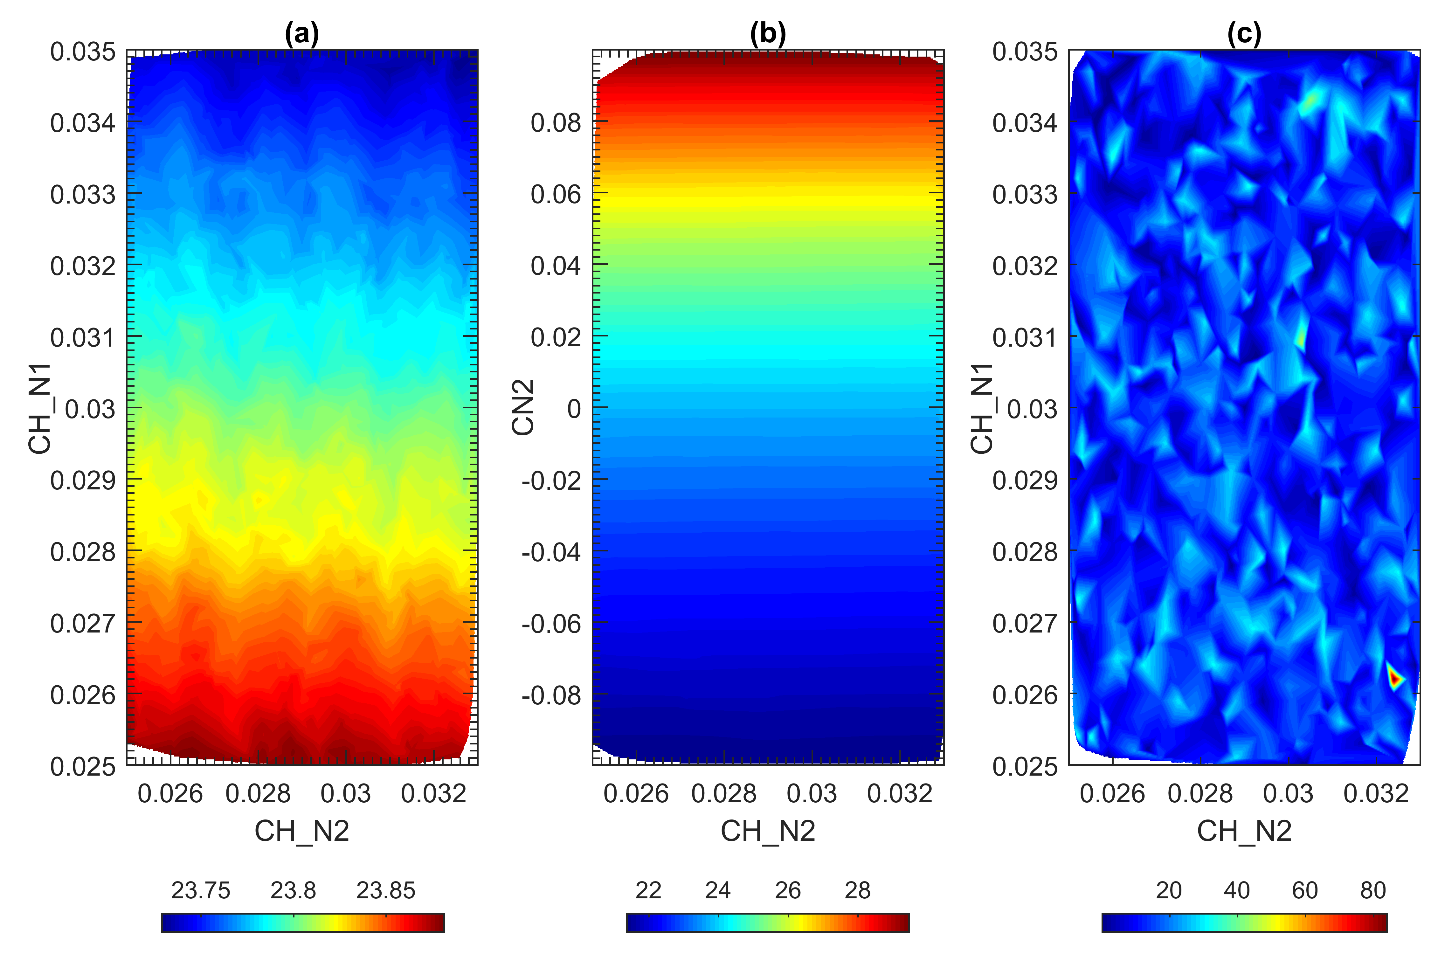


**Figure S5.** (a), (b) and (c) were generated from 1000 runs each using the SWAT model for the South Branch of the Root River (sub-model of the Root River SWAT model with same parametrization as the larger RRW model. (a) Contour plot of PBIAS (coded as color) value for Manning's ‘n’ value for the tributary channels (CH_N1) and Manning's ‘n’ value for the main channel (CH_N2). (b) Contour plot of PBIAS value for Curve Number (CN2) and Manning's ‘n’ value for the main channel (CH_N2). (a) Contour plot of PBIAS value for Manning's ‘n’ value for the tributary channels (CH_N1) and Manning's ‘n’ value for the main channel (CH_N2) when 18 parameters were varied.


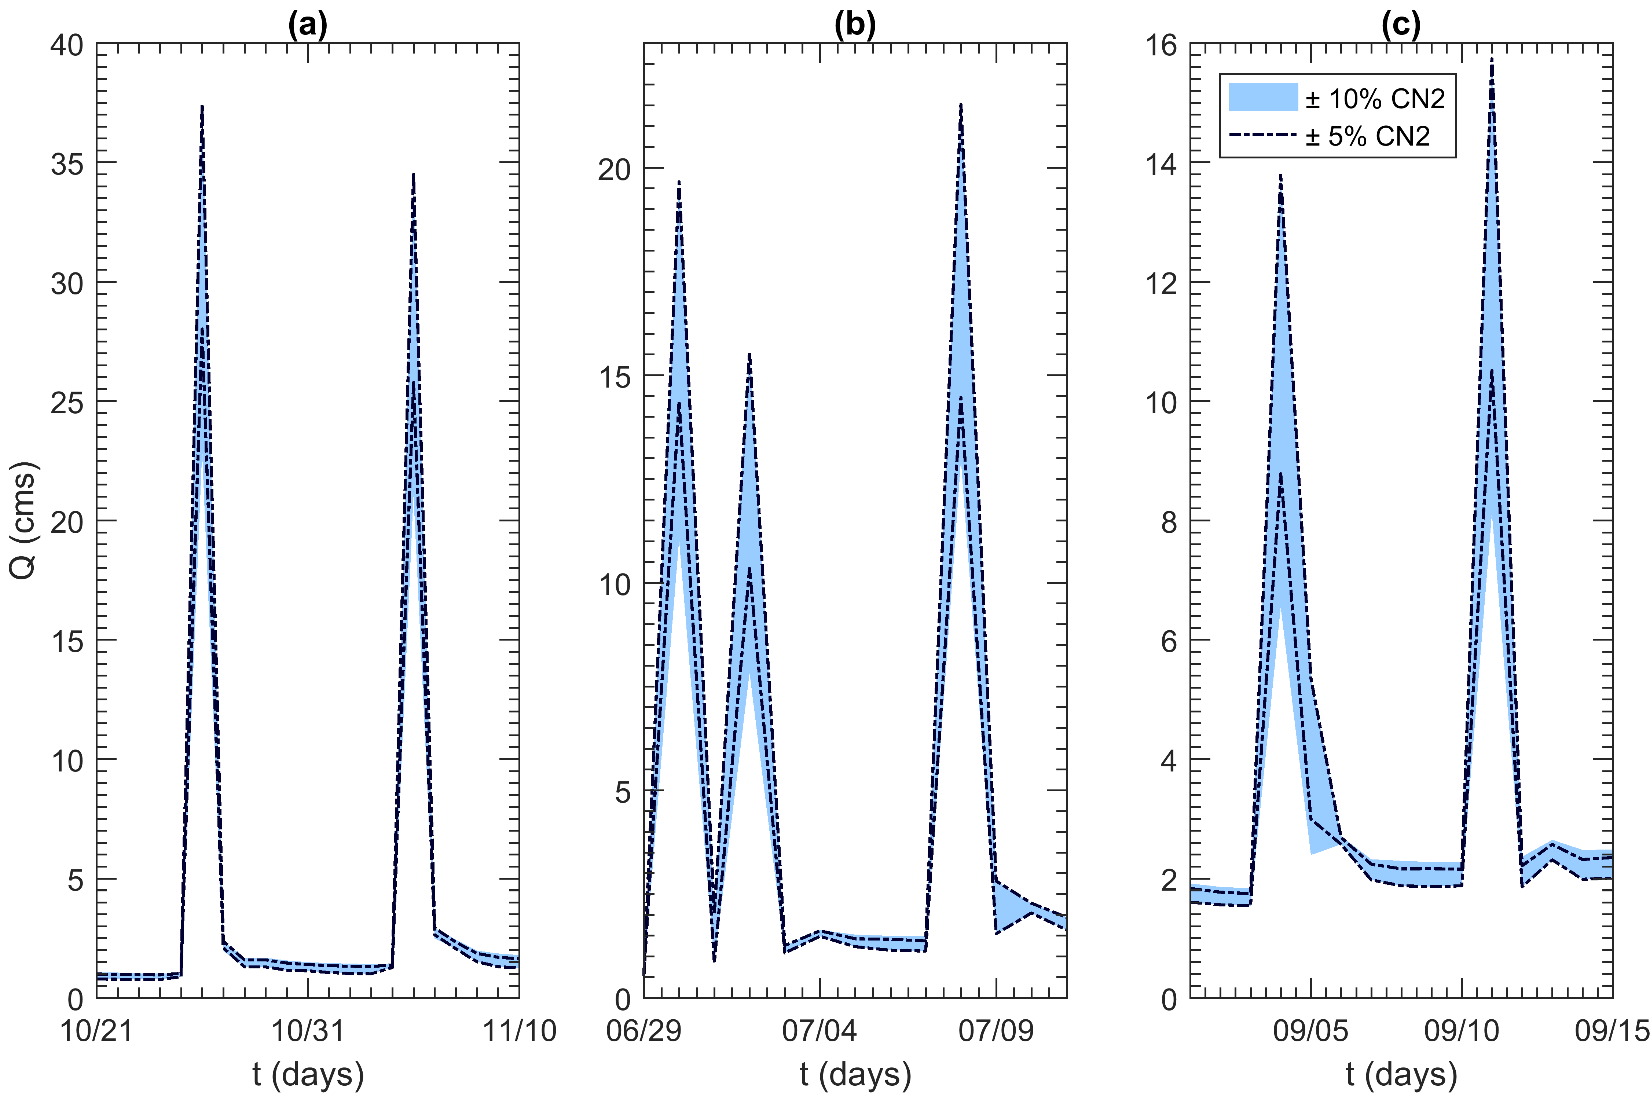


**Figure S6.** High sensitivity of CN2 is illustrated using 1000 runs for the South Branch gage of the RRB. To mimic common calibration practices in SWAT model applications, CN2 was varied 1000 times in the ±10% range of the initialized value using Latin Hypercube Sampling procedure. Initialized values were specified in a distributed setting at the spatial resolution of the hru based on land use, soil type and condition. A ±5% of the initialized value case consisting of 1000 runs are shown to account for any variability in potential model application scenario to simulate a management practice. Only runs with NSE >0.6 are shown for both cases.

**
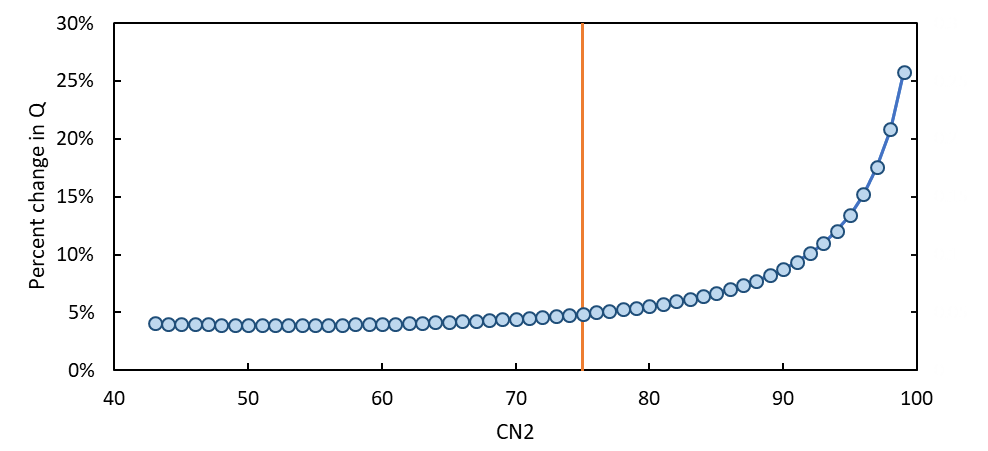
**

**Figure S7.** Changes in surface runoff with CN2 illustrated a constant rainfall condition. Changes in CN2 at higher values of CN2 (approximately > 75, shown with the solid vertical line) resulted in considerably higher surface runoff than for changes in CN2 on the lower side.


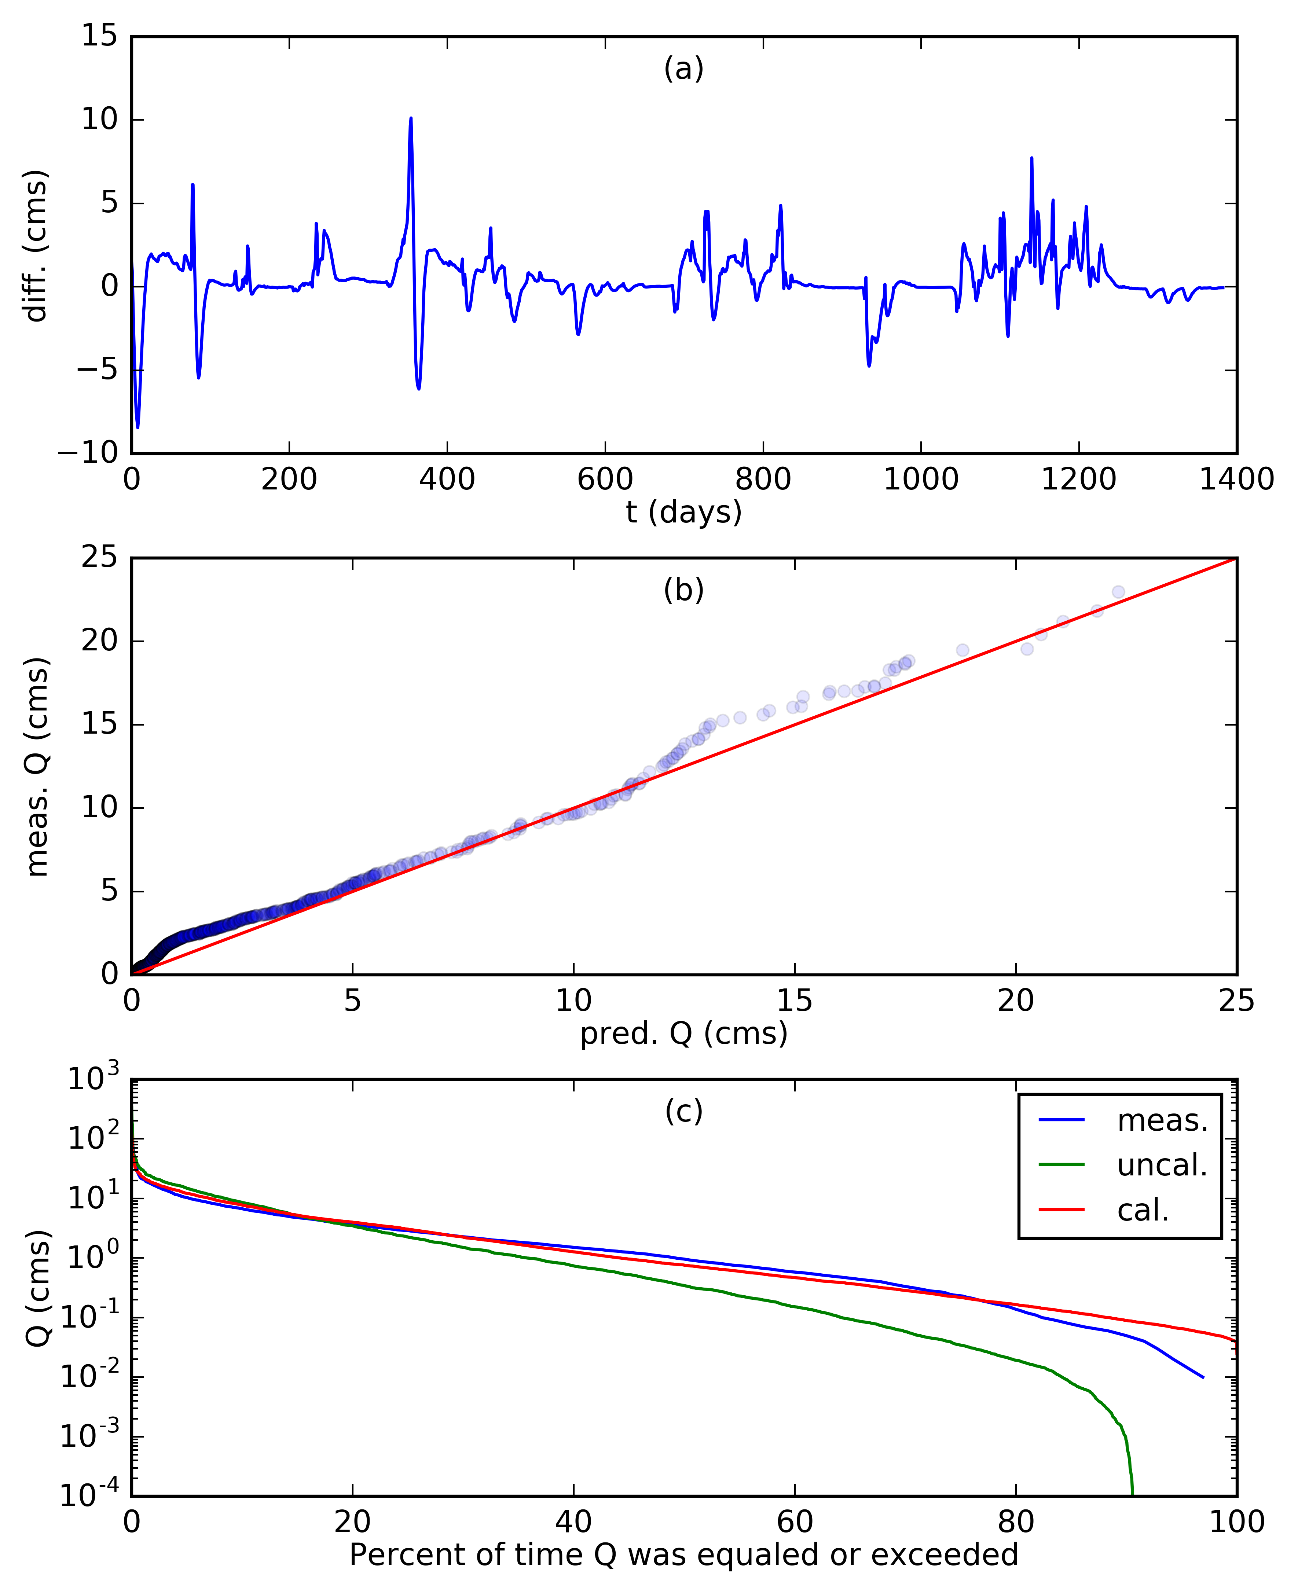


**Figure S8.** (a) Euclidian distance between the measured and predicted flow for the Little Cobb River in the Le Sueur River Basin (b) Q-Q plot between the measured and predicted flows for the Little Cobb River in the Le Sueur River Basin. NSE = 0.78 for the data shown in the plot. The solid red line is the 1:1 reference line. (c) Flow Duration Curve for uncalibrated and calibrated model flows contrasted with measured flow for the Little Cobb River in the Le Sueur River Basin. Flow data shown is for the time period from 1996 to 1999.

Table S1. List of SWAT model parameters that were calibrated for the Le Sueur River Basin (LSRB) along with their classification into the three sets. Only pure and derived calibration parameters were adjusted.

| Parameter | Adjustment status | Description | SWAT default value | Calibrated value | Calibrated range |
| --- | --- | --- | --- | --- | --- |
| .bsn file - General watershed description file | | | | |  |
| SFTMP | P | Snowfall temperature (°C) | 1 | 2.2 | NA |
| SMTMP | P | Snow melt base temperature (°C) | 0.5 | 0.5 | NA |
| SMFMX | P | Melt factor for snow on June 21  (mm H2O/°C-day) | 4.5 | 4 | NA |
| SMFMN | P | Melt factor for snow on December 21 (mm H2O/°C-day) | 4.5 | 2 | NA |
| TIMP | P | Snow pack temperature lag factor | 1 | 0.815 | NA |
| SNOCOVMX | P | Minimum snow water content that corresponds to 100% snow over  (mm H2O) | 1 | 10 | NA |
| SNO50COV | P | Fraction of snow volume represented by SNOCOVMC that corresponds to 50% snow cover | 0.5 | 0.5 | NA |
| IPET | P* | Potential evapotranspiration (PET) method | Penman/ Monteith | Hargreaves | NA |
| ESCO | P | Soil evaporation compensation factor | 0.95 | 0.98 | NA |
| EPCO | P | Plant uptake compensation factor | 1 | 0.005 | NA |
| ICN | P* | Daily curve number calculation method | Soil moisture method | Plant ET method | NA |
| CNCOEF | P | Plant ET curve number coefficient | 1 | 0.7 | NA |
| CN_FROZ | P | Frozen soil infiltration factor | 0.000862, ‘inactive’ | 0.002, ‘active’ | NA |
| ITDRN |  | Tile drain equation flag | 0 | 1 | NA |
| IWTDN |  | Water table algorithm flag | 0 | 1 | NA |
| .gw file - Groundwater input file | | | | |  |
| GW_DELAY | P | Groundwater delay time (days) | 31 | 42.63 | NA |
| ALPHA_BF | P | Baseflow alpha factor (1/days) | 0.048 | 0.83 | NA |
| GWQMN | P | Threshold depth of water in the shallow aquifer required for return flow to occur (mm H20) | 1000 | 1359.61 | NA |
| GW_REVAP | P | Groundwater revap coefficient | 0.02 | 0.047 | NA |
| .sub file - Subbasin general input file | | | | |  |
| CH_N1 | D | Mannings ‘n’ value for tributary channel | 0.014 | 0.04 | NA |
| CH_K1 | D | Effective hydraulic conductivity in tributary channel alluvium (mm/hr) | 0 | 30.9 | NA |
| .rte file – Main channel input file | | | | |  |
| CH_N2 | P | Mannings ‘n’ value for main channel | 0.014 | 0.037 | NA |
| CH_K2 | P | Effective hydraulic conductivity in main channel alluvium (mm/hr) | 0 | 171.3 | NA |
|  | | | | | |
| Parameter | **Adjustment status** | **Description** | **SWAT default value** | **Calibrated value** | **Calibrated range** |
|  |  | .hru file – HRU general input file |  |  |  |
| DEP_IMP | P | Depth to impervious layer in soil profile (mm) | NA | 2237.17 | NA |
| RE | D | Effective radius of drains (mm) | 50 | 25 | NA |
| SDRAIN | P | Distance between two drains or tile tubes (mm) | NA | NA | 15000 - 18200 |
| OV_N | D | Manning's "n" value for overland flow | -999 | 0.03 | NA |
| - NA – Not Applicable - P – Pure calibration parameter - P*– Model structure. Considered as pure calibration parameter. - D – Derived calibration parameter - Scheduling: In theory it is knowable or measurable information, but in reality it is hard to obtain on the scale of a large watershed (> 2000 km2). It is specified as a measured parameter in this paper. | | | | | |

**Table S2**. Calibration and validation period for Le Sueur River Basin SWAT model

| Stream gage | Calibration period | Validation period |
| --- | --- | --- |
| Le Sueur River at St. Clair, CSAH28 | 3/26/2007 to 3/28/2009 | 3/29/2009 to 10/26/2010 |
| Le Sueur River at Rapidan, CR8 | 3/29/2006 to 7/7/2008 | 7/8/2008 to 10/26/2010 |
| LSR near Rapidan, MN66 | 1/1/1983 to 12/24/1996 | 12/25/1996 to 12/31/2010 |
| Little Beauford Ditch | 3/21/1996 to 4/5/2005 | 4/6/2005 to 12/31/2007 |
| Little Cobb River near Beauford | 4/1/1996 to 8/13/2003 | 8/14/2003 to 12/31/2010 |
| Big Cobb River near Beauford, CR16 | 10/1/2005 to 3/19/2008 | 3/20/2008 to 10/26/2010 |
| Maple River near Rapidan, CR35 | 4/24/2003 to 1/20/2007 | 1/21/2007 to 10/28/2010 |
| Maple River near Sterling Center, CR18 | 10/1/2005 to 12/31/2007 | 1/1/2008 to 10/24/2010 |

Table S3. List of SWAT model parameters that were calibrated for the Root River Basin (RRB) along with their classification into three sets. Only pure and derived calibration parameters were adjusted.

| Parameter | Adjustment status | Description | SWAT default value | Calibrated value | Calibrated range |
| --- | --- | --- | --- | --- | --- |
| .bsn file - General watershed description file | | | | | |
| SFTMP | P | Snowfall temperature (°C) | 1 | 2.35 | NA |
| SMTMP | P | Snow melt base temperature (°C) | 0.5 | 0.14 | NA |
| SMFMX | P | Melt factor for snow on June 21 (mm H2O/°C-day) | 4.5 | 3.41 | NA |
| SMFMN | P | Melt factor for snow on December 21 (mm H2O/°C-day) | 4.5 | 2.54 | NA |
| TIMP | P | Snow pack temperature lag factor | 1 | 0.53 | NA |
| SNOCOVMX | P | Minimum snow water content that corresponds to 100% snow over (mm H2O) | 1 | 4.35 | NA |
| SNO50COV | P | Fraction of snow volume represented by SNOCOVMC that corresponds to 50% snow cover | 0.5 | 0.27 | NA |
| IPET | P* | Potential evapotranspiration (PET) method | Penman/ Monteith | Hargreaves | NA |
| ESCO | P | Soil evaporation compensation factor | 0.95 | 0.81 |  |
| EPCO | P | Plant uptake compensation factor | 1 | 0.19 |  |
| ICN | P* | Daily curve number calculation method | Soil Moisture Method | Plant ET Method | NA |
| CNCOEF | P | Plant ET curve number coefficient | 1 | 0.61 | NA |
| CN_FROZ | P | Frozen soil infiltration factor | 0.000862, ‘inactive’ | 0.00167, ‘active’ | NA |
| .gw file - Groundwater input file | | | | | |
| GW_DELAY | P | Groundwater delay time (days) | 31 | NA | 1.2 - 456.7 |
| ALPHA_BF | P | Baseflow alpha factor (1/days) | 0.048 | NA | 0.58 - 1.0 |
| GWQMN | P | Threshold depth of water in the shallow aquifer required for return flow to occur (mm H20) | 1000 | NA | 1.6 - 1214.6 |
| .sub file - Subbasin general input file | | | | | |
| CH_N1 | P | Mannings ‘n’ value for tributary channel | 0.014 | NA | 0.03 – 0.09 |
| CH_K1 | P | Effective hydraulic conductivity in tributary channel alluvium (mm/hr) | 0 | NA | 7.8 – 143.8 |
| .rte file – Main channel input file | | | | | |
| CH_N2 | P | Mannings ‘n’ value for main channel | 0.014 | NA | 0.034 – 0.047 |
| CH_K2 | P | Effective hydraulic conductivity in main channel alluvium (mm/hr) | 0 | NA | 0.86 – 93.02 |
| - NA – Not Applicable - P – Pure calibration parameter - P*– Model structure. Considered as pure calibration parameter. - D – Derived calibration parameter - Scheduling: In theory it is knowable or measurable information, but in reality it is hard to obtain on the scale of a large watershed (> 2000 km2). It is specified as a measured parameter in this paper. | | | | | |

**Table S4.** Calibration and validation period for Root River Basin SWAT model.

| Stream gage | Calibration period | Validation period |
| --- | --- | --- |
| Middle Branch | 3/30/2013 to 5/31/2013 | 6/1/2013 to 11/21/2013 |
| Houston | 1/1/2000 to 12/31/2007 | 1/1/2008 to 12/31/2013 |
| Mound Prairie | 10/10/2008 to 5/22/2011 | 5/23/2011 to 12/31/2013 |
| Pilot Mound | 8/9/2002 to 5/8/2008 | 5/9/2008 to 12/31/2013 |
| South Branch | 4/15/2008 to 11/18/2009 | 3/9/2010 to 11/8/2010 |

Table S5. List of 18 SWAT model parameters that were adjusted to illustrate numerous local maxima.

| Parameter | Range (min.) | Range (max.) |
| --- | --- | --- |
| ALPHA_BF.gw | 0 | 1 |
| GW_DELAY.gw | 1 | 450 |
| GWQMN.gw | 1 | 1000 |
| CH_N2.rte | 0.025 | 0.033 |
| CH_K2.rte | 0 | 100 |
| CH_N1.sub | 0.025 | 0.035 |
| CH_K1.sub | 0 | 100 |
| SFTMP.bsn | 2.3 | 2.4 |
| SMTMP.bsn | -1 | 1 |
| SMFMX.bsn | 3 | 4 |
| SMFMN.bsn | 2 | 3 |
| TIMP.bsn | 0.4 | 0.6 |
| SNOCOVMX.bsn | 0 | 10 |
| SNO50COV.bsn | 0 | 0.5 |
| ESCO.bsn | 0.5 | 1 |
| EPCO.bsn | 0 | 0.3 |
| CNCOEF.bsn | 0.5 | 0.8 |
| CN_FROZ.bsn | 0.001 | 0.003 |

# References

1 Gupta, H.V.; Kling, H.; Yilmaz, K.K.; Martinez, G.F. Decomposition of the mean squared error and nse performance criteria: Implications for improving hydrological modelling. *Journal of Hydrology* **2009**, *377*, 80-91.

2 Krause, P.; Boyle, D.P.; Bäse, F. Comparison of different efficiency criteria for hydrological model assessment. *Adv. Geosci.* **2005**, *5*, 89-97.

3 Gupta, H.V.; Sorooshian, S.; Yapo, P.O. Status of automatic calibration for hydrologic models: Comparison with multilevel expert calibration. *Journal of Hydrologic Engineering* **1999**, *4*, 135-143.

4 Nash, J.E.; Sutcliffe, J.V. River flow forecasting through conceptual models part i — a discussion of principles. *Journal of Hydrology* **1970**, *10*, 282-290.

5 Te Chow, V. *Open channel hydraulics*. McGraw-Hill Book Company, Inc; New York: 1959.

6 Efstratiadis, A.; Koutsoyiannis, D. One decade of multi-objective calibration approaches in hydrological modelling: A review. *Hydrological Sciences Journal* **2010**, *55*, 58-78.

7 Williams, J.R.; Kannan, N.; Wang, X.; Santhi, C.; Arnold, J.G. Evolution of the scs runoff curve number method and its application to continuous runoff simulation. *Journal of Hydrologic Engineering* **2012**, *17*, 1221-1229.

8 Neitsch, S.L.; Williams, J.; Arnold, J.; Kiniry, J. *Soil and water assessment tool theoretical documentation version 2009*; Texas Water Resources Institute: 2011.

9 Helsel, D.R.; Hirsch, R.M. *Statistical methods in water resources*. Elsevier: 1992; Vol. 49.

10 Son, K.; Sivapalan, M. Improving model structure and reducing parameter uncertainty in conceptual water balance models through the use of auxiliary data. *Water Resources Research* **2007**, *43*, n/a-n/a.

11 Labat, D. Recent advances in wavelet analyses: Part 1. A review of concepts. *Journal of Hydrology* **2005**, *314*, 275-288.

12 Grinsted, A.; Moore, J.C.; Jevrejeva, S. Application of the cross wavelet transform and wavelet coherence to geophysical time series. *Nonlinear Processes in Geophysics* **2004**, *11*, 561-566.

13 Anctil, F.; Pratte, A.; Parent, L.; Bolinder, M. Non-stationary temporal characterization of the temperature profile of a soil exposed to frost in south-eastern canada. *Nonlinear Processes in Geophysics* **2008**, *15*, 409.

14 Paul, S.A. Wavelet transforms and the ecg: A review. *Physiological Measurement* **2005**, *26*, R155.

15 Farge, M.; Guezennec, Y.; Ho, C.; Meneveau, C. In *Continuous wavelet analysis of coherent structures*, Proceedings of the 1990 Summer Program, 1990; pp 331-348.

16 Liu, Y.; Brown, J.; Demargne, J.; Seo, D.-J. A wavelet-based approach to assessing timing errors in hydrologic predictions. *Journal of Hydrology* **2011**, *397*, 210-224.

17 Schaefli, B.; Gupta, H.V. Do nash values have value? *Hydrological Processes* **2007**, *21*, 2075-2080.

18 Daubechies, I. *Ten lectures on wavelets*. Siam: 1992; Vol. 61.

19 Foufoula-Georgiou, E.; Kumar, P. *Wavelets in geophysics*. Academic Press: 2014; Vol. 4.
